# Supplementary material for: New ligands for nickel catalysis from diverse pharmaceutical heterocycle libraries
Source: Springer Nature journal article supplement (doi:10.1038/nchem.2587), 2016-08-08
Supplement: 41557_2016_BFnchem2587_MOESM55_ESM.mol [file 41557_2016_BFnchem2587_MOESM55_ESM.mol]

nchem.2587-compA15.mol
  ChemDraw07191611222D

 14 12  0  0  0  0  0  0  0  0999 V2000
   -2.4781    1.2491    0.0000 Cl  0  5  0  0  0  0  0  0  0  0  0  0
    2.4781    1.2491    0.0000 Cl  0  5  0  0  0  0  0  0  0  0  0  0
   -0.7959   -0.0116    0.0000 C   0  0  0  0  0  0  0  0  0  0  0  0
   -0.7959   -0.8366    0.0000 C   0  0  0  0  0  0  0  0  0  0  0  0
   -0.0814   -1.2491    0.0000 C   0  0  0  0  0  0  0  0  0  0  0  0
    0.6330   -0.8366    0.0000 C   0  0  0  0  0  0  0  0  0  0  0  0
    0.6330   -0.0116    0.0000 C   0  0  0  0  0  0  0  0  0  0  0  0
   -0.0814    0.4009    0.0000 N   0  0  0  0  0  0  0  0  0  0  0  0
    1.3475    0.4009    0.0000 C   0  0  0  0  0  0  0  0  0  0  0  0
   -1.5104    0.4009    0.0000 C   0  0  0  0  0  0  0  0  0  0  0  0
   -1.5104    1.2259    0.0000 N   0  3  0  0  0  0  0  0  0  0  0  0
   -2.2248   -0.0116    0.0000 N   0  0  0  0  0  0  0  0  0  0  0  0
    1.3475    1.2259    0.0000 N   0  3  0  0  0  0  0  0  0  0  0  0
    2.0620   -0.0116    0.0000 N   0  0  0  0  0  0  0  0  0  0  0  0
  3  4  2  0      
  4  5  1  0      
  5  6  2  0      
  6  7  1  0      
  7  8  2  0      
  8  3  1  0      
  7  9  1  0      
  3 10  1  0      
 10 11  2  0      
 10 12  1  0      
  9 13  2  0      
  9 14  1  0      
M  CHG  4   1  -1   2  -1  11   1  13   1
M  END
