# Supplementary material for: New ligands for nickel catalysis from diverse pharmaceutical heterocycle libraries
Source: Springer Nature journal article supplement (doi:10.1038/nchem.2587), 2016-08-08
Supplement: 41557_2016_BFnchem2587_MOESM69_ESM.mol [file 41557_2016_BFnchem2587_MOESM69_ESM.mol]

nchem.2587-compC1.mol
  ChemDraw07191611222D

 16 17  0  0  0  0  0  0  0  0999 V2000
   -1.4289   -0.8249    0.0000 C   0  0  0  0  0  0  0  0  0  0  0  0
   -1.4289   -1.6499    0.0000 C   0  0  0  0  0  0  0  0  0  0  0  0
   -0.7145   -2.0624    0.0000 C   0  0  0  0  0  0  0  0  0  0  0  0
    0.0000   -1.6499    0.0000 N   0  0  0  0  0  0  0  0  0  0  0  0
    0.0000   -0.8249    0.0000 C   0  0  0  0  0  0  0  0  0  0  0  0
   -0.7145   -0.4124    0.0000 C   0  0  0  0  0  0  0  0  0  0  0  0
    0.7145   -0.4124    0.0000 C   0  0  0  0  0  0  0  0  0  0  0  0
    0.7145    0.4126    0.0000 C   0  0  0  0  0  0  0  0  0  0  0  0
    1.4289   -0.8249    0.0000 N   0  0  0  0  0  0  0  0  0  0  0  0
    2.1434   -0.4124    0.0000 C   0  0  0  0  0  0  0  0  0  0  0  0
    2.1434    0.4126    0.0000 C   0  0  0  0  0  0  0  0  0  0  0  0
    1.4289    0.8251    0.0000 C   0  0  0  0  0  0  0  0  0  0  0  0
    1.4289    1.6501    0.0000 O   0  0  0  0  0  0  0  0  0  0  0  0
    2.1430    2.0624    0.0000 C   0  0  0  0  0  0  0  0  0  0  0  0
   -2.1434   -0.4124    0.0000 O   0  0  0  0  0  0  0  0  0  0  0  0
   -2.1434    0.4122    0.0000 C   0  0  0  0  0  0  0  0  0  0  0  0
 12 13  1  0      
 13 14  1  0      
  1 15  1  0      
 15 16  1  0      
  1  2  2  0      
  2  3  1  0      
  3  4  2  0      
  4  5  1  0      
  5  6  2  0      
  6  1  1  0      
  5  7  1  0      
  7  8  2  0      
  7  9  1  0      
  9 10  2  0      
 10 11  1  0      
 11 12  2  0      
 12  8  1  0      
M  STY  1   1 SUP
M  SLB  1   1   1
M  SAL   1  2  13  14
M  SBL   1  1   1
M  SMT   1 OMe
M  SBV   1   1    0.0000   -0.8250
M  STY  1   2 SUP
M  SLB  1   2   2
M  SAL   2  2  15  16
M  SBL   2  1   3
M  SMT   2 ^OMe
M  SBV   2   3    0.7145   -0.4125
M  END
