# Supplementary material for: New ligands for nickel catalysis from diverse pharmaceutical heterocycle libraries
Source: Springer Nature journal article supplement (doi:10.1038/nchem.2587), 2016-08-08
Supplement: 41557_2016_BFnchem2587_MOESM77_ESM.mol [file 41557_2016_BFnchem2587_MOESM77_ESM.mol]

nchem.2587-compC5.mol
  ChemDraw07201610172D

 26 30  0  0  0  0  0  0  0  0999 V2000
   -0.7145   -1.4437    0.0000 C   0  0  0  0  0  0  0  0  0  0  0  0
   -0.7145   -2.2687    0.0000 C   0  0  0  0  0  0  0  0  0  0  0  0
   -0.0000   -2.6812    0.0000 C   0  0  0  0  0  0  0  0  0  0  0  0
    0.7145   -2.2687    0.0000 N   0  0  0  0  0  0  0  0  0  0  0  0
    0.7145   -1.4437    0.0000 C   0  0  0  0  0  0  0  0  0  0  0  0
   -0.0000   -1.0312    0.0000 C   0  0  0  0  0  0  0  0  0  0  0  0
    1.4289   -1.0312    0.0000 C   0  0  0  0  0  0  0  0  0  0  0  0
    1.4289   -0.2062    0.0000 C   0  0  0  0  0  0  0  0  0  0  0  0
    0.7145    0.2063    0.0000 C   0  0  0  0  0  0  0  0  0  0  0  0
   -0.0000   -0.2062    0.0000 C   0  0  0  0  0  0  0  0  0  0  0  0
    2.1434   -1.4437    0.0000 N   0  0  0  0  0  0  0  0  0  0  0  0
    2.8579   -1.0312    0.0000 C   0  0  0  0  0  0  0  0  0  0  0  0
    2.8579   -0.2062    0.0000 C   0  0  0  0  0  0  0  0  0  0  0  0
    2.1434    0.2063    0.0000 C   0  0  0  0  0  0  0  0  0  0  0  0
    2.1434    1.0313    0.0000 C   0  0  0  0  0  0  0  0  0  0  0  0
   -1.4289   -1.0312    0.0000 C   0  0  0  0  0  0  0  0  0  0  0  0
   -1.4289   -0.2062    0.0000 C   0  0  0  0  0  0  0  0  0  0  0  0
   -2.1434    0.2063    0.0000 C   0  0  0  0  0  0  0  0  0  0  0  0
   -2.8579   -0.2062    0.0000 C   0  0  0  0  0  0  0  0  0  0  0  0
   -2.8579   -1.0312    0.0000 C   0  0  0  0  0  0  0  0  0  0  0  0
   -2.1434   -1.4437    0.0000 C   0  0  0  0  0  0  0  0  0  0  0  0
    2.8579    1.4438    0.0000 C   0  0  0  0  0  0  0  0  0  0  0  0
    2.8579    2.2687    0.0000 C   0  0  0  0  0  0  0  0  0  0  0  0
    2.1434    2.6812    0.0000 C   0  0  0  0  0  0  0  0  0  0  0  0
    1.4289    2.2687    0.0000 C   0  0  0  0  0  0  0  0  0  0  0  0
    1.4289    1.4438    0.0000 C   0  0  0  0  0  0  0  0  0  0  0  0
  1  2  2  0      
  2  3  1  0      
  3  4  2  0      
  4  5  1  0      
  5  6  2  0      
  6  1  1  0      
  5  7  1  0      
  7  8  2  0      
  8  9  1  0      
  9 10  2  0      
 10  6  1  0      
  7 11  1  0      
 11 12  2  0      
 12 13  1  0      
 13 14  2  0      
 14  8  1  0      
 14 15  1  0      
  1 16  1  0      
 16 17  2  0      
 17 18  1  0      
 18 19  2  0      
 19 20  1  0      
 20 21  2  0      
 21 16  1  0      
 15 22  2  0      
 22 23  1  0      
 23 24  2  0      
 24 25  1  0      
 25 26  2  0      
 26 15  1  0      
M  END
